# Supplementary material for: Highly Responsive UV Light Sensors Using Mg-Doped ZnO Nanoparticles
Source: Hindawi journal article supplement (doi:10.1155/2016/8296936), 2016-01-01
Supplement: f1 [file 8296936.f1.pdf]

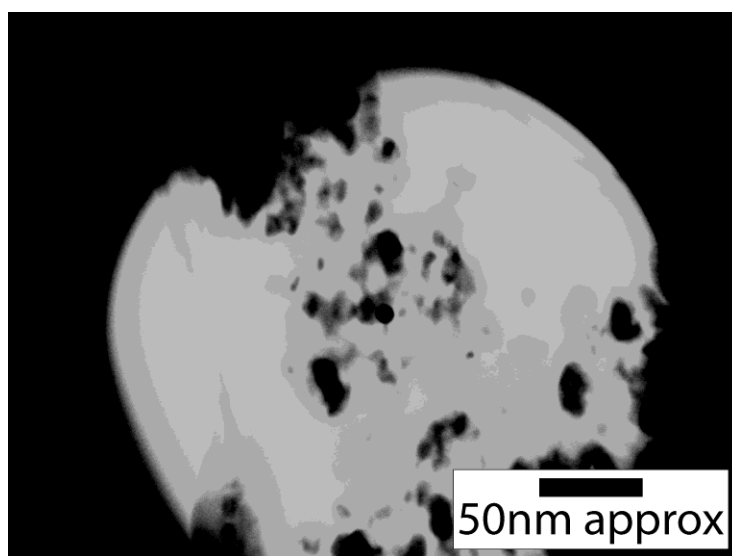

**Support Figure S1:** TEM image of pure ZnO, with approximate particle size of  $5.11 \pm 2.14$  nm. TEM camera was out of order and image was taken by placing ordinary digital camera on the TEM eye piece. The scale bar is approximate and measured by measuring diameter of spherical particle in the center before taking the image. It is a support figure because it does not contain necessary and required information.
